# Supplementary material for: Enzymatic conversion of carbon dioxide
Source: Royal Society of Chemistry journal article supplement (doi:10.1039/c5cs00182j), 2015-01-01
Supplement: c5cs00182j1.pdf [file c5cs00182j1.pdf]

# Supplementary information

## *Enzymatic conversion of carbon dioxide*

*Jiafu Shi<sup>1, 2,3, †</sup>, Yanjun Jiang<sup>4, †</sup>, Zhongyi Jiang<sup>1, 3,\*</sup>, Xueyan Wang<sup>1,3</sup>, Xiaoli Wang<sup>1,3</sup>, Shaohua Zhang<sup>1,3</sup>, Pingping Han<sup>1,3</sup>, Chen Yang<sup>1,3</sup>*

*<sup>1</sup> Key Laboratory for Green Chemical Technology of Ministry of Education, School of Chemical Engineering and Technology, Tianjin University, Tianjin 300072, China.*

*<sup>2</sup> School of Environmental Science and Engineering, Tianjin University, Tianjin 300072, China*

*<sup>3</sup> Collaborative Innovation Center of Chemical Science and Engineering (Tianjin), Tianjin, 300072, China*

*<sup>4</sup> School of Chemical Engineering and Technology, HeBei University of Technology, Tianjin 300130, China*

*<sup>†</sup> JF Shi and YJ Jiang contributed equally.*

**Table S1.** Pathways for autotrophic CO<sub>2</sub>.

| Pathway                                                | CO <sub>2</sub> -fixing enzymes<br>(active “CO <sub>2</sub> ” species)                                                                                                                                                                              | Selected intermediates                                                                           | Major enzymes                                                                                                                                                                           | Occurrence                                                                                                                                                                                                              |
|--------------------------------------------------------|-----------------------------------------------------------------------------------------------------------------------------------------------------------------------------------------------------------------------------------------------------|--------------------------------------------------------------------------------------------------|-----------------------------------------------------------------------------------------------------------------------------------------------------------------------------------------|-------------------------------------------------------------------------------------------------------------------------------------------------------------------------------------------------------------------------|
| Calvin cycle                                           | Rubisco (CO <sub>2</sub> )                                                                                                                                                                                                                          | 3-phosphoglycerate,<br>triose phosphates, sugar<br>phosphates                                    | Rubisco, phosphoglyceraldehyde<br>dehydrogenase,<br>phosphoribulokinase                                                                                                                 | Plants, algae, cyanobacteria,<br>most aerobic or facultative<br>aerobic <i>Eubacteria</i>                                                                                                                               |
| Reductive citric acid<br>cycle                         | 2-Oxoglutarate synthase<br>(CO <sub>2</sub> ), $\alpha$ -ketoglutarate<br>synthase (CO <sub>2</sub> ); isocitrate<br>dehydrogenase (CO <sub>2</sub> ),<br>PEP carboxylase (HCO <sub>3</sub> <sup>-</sup> ),<br>pyruvate synthase (CO <sub>2</sub> ) | Acetyl-CoA, pyruvate,<br>oxaloacetate, succinyl-CoA, $\alpha$ -<br>ketoglutarate, 2-oxoglutarate | 2-Oxoglutarate synthase, $\alpha$ -<br>ketoglutarate synthase, isocitrate<br>dehydrogenase, pyruvate synthase,<br>pyruvate carboxylase, PEP<br>carboxylase, ATP-citrate lyase           | <i>Chlorobiales</i> , <i>Aquificales</i> ,<br><i>Epsilonproteobacteria</i> ,<br>some <i>Deltaproteobacteria</i> ,<br>few <i>Alphaproteobacteria</i><br>( <i>Magnetococcus</i> ),<br><i>Nitrospirae</i>                  |
| Reductive acetyl-<br>CoA pathway                       | CO dehydrogenase (CO <sub>2</sub> ),<br>formate dehydrogenase<br>(CO <sub>2</sub> ),                                                                                                                                                                | Acetyl-CoA, methyl-H <sub>4</sub> folate,<br>methylated corrinoid protein,<br>formate            | Acetyl-CoA synthase, CO<br>dehydrogenase, formate<br>dehydrogenase, corrinoid iron-<br>sulfur protein methyltransferase,<br>enzymes reducing formate to<br>methyl-H <sub>4</sub> folate | <i>Methanogenic</i> and sulfate<br>reducing <i>Euryarchaeota</i> ,<br>acetogenic <i>Firmicutes</i> ,<br>some <i>Spirochaetes</i> , many<br><i>Deltaproteobacteria</i> ,<br>annamox bacteria of<br><i>Planctomycetes</i> |
| 3-<br>Hydroxypropionate<br>bi-cycle                    | Acetyl-CoA-carboxylase<br>(HCO <sub>3</sub> <sup>-</sup> ),<br>propionyl-CoA<br>carboxylase (HCO <sub>3</sub> <sup>-</sup> )                                                                                                                        | Acetyl-CoA, malony-CoA,<br>propionyl-CoA,<br>methylmalonyl-CoA, succinyl-<br>CoA, methyl-CoA     | Acetyl-CoA-carboxylase,<br>propionyl-CoA carboxylase                                                                                                                                    | <i>Chloroflexaceae</i>                                                                                                                                                                                                  |
| 3-<br>Hydroxypropionate/<br>4-hydroxybutyrate<br>Cycle | Acetyl-CoA carboxylase<br>(HCO <sub>3</sub> <sup>-</sup> ), pyruvate<br>synthase (CO <sub>2</sub> ), propionyl-<br>CoA carboxylase (HCO <sub>3</sub> <sup>-</sup> )                                                                                 | Acetyl-CoA, succinyl-CoA,<br>methylmalonyl-CoA, 3-<br>phosphate glyceraldehyde                   | Acetyl-CoA carboxylase, propionyl-<br>CoA carboxylase, 4-<br>hydroxybutyryl-CoA dehydratase,<br>pyruvate synthase                                                                       | Aerobic <i>Sulfolobales</i><br>( <i>Crenarchaeota</i> ), possibly<br>marine and soil ammonia<br>oxidizing <i>Crenarchaeota</i>                                                                                          |
| Dicarboxylate/4-<br>hydroxybutyrate<br>cycle           | Pyruvate synthase (CO <sub>2</sub> ),<br>PEP carboxylase (HCO <sub>3</sub> <sup>-</sup> )                                                                                                                                                           | Acetyl-CoA, pyruvate, PEP,<br>oxaloacetate, succinyl-CoA,<br>oxaloacetate                        | 4-Hydroxybutyryl-CoA<br>dehydratase, PEP carboxylase,<br>pyruvate synthase                                                                                                              | Anaerobic<br><i>Thermoproteales</i> ,<br><i>Desulfurococcales</i>                                                                                                                                                       |

**Figure S1. The Calvin cycle.**

**Figure S2. The reductive citric acid cycle.**

**Figure S3. The reductive acetyl-CoA route.**

**Figure S4. The 3-hydroxypropionate cycle.**



**Figure S6. The dicarboxylate/4-hydroxybutyrate cycle.**



**Figure S7.** Facilitated transport mechanism of the membrane reactor. Reproduced with permission from ref. 31. Copyright 2010 Elsevier.

**Figure S8.** Schematic converting process of CO<sub>2</sub> into CaCO<sub>3</sub> utilizing CA-encapsulated bioinspired silica as the catalysts. Reproduced with permission from ref. 34. Copyright 2013 Royal Society of Chemistry.

**Table S2.** Comparison of enzyme catalytic performance (pH 7.0, 20 °C). Reproduced with permission from ref. 34. Copyright 2013 Royal Society of Chemistry.

| Sample             | CO <sub>2</sub> removal efficiency % | $V_{\max}$ [mM min <sup>-1</sup> ]        | $K_M$ [mM]      | <i>Sp.</i> Activity [U mg <sup>-1</sup> ] | Activity % |
|--------------------|--------------------------------------|-------------------------------------------|-----------------|-------------------------------------------|------------|
| Immobilized enzyme | 86                                   | $5.4 \times 10^{-3} \pm 1 \times 10^{-4}$ | $0.43 \pm 0.02$ | $1.1 \pm 0.1$                             | $58 \pm 5$ |
| Free enzyme        | 90                                   | $5.4 \times 10^{-3} \pm 1 \times 10^{-4}$ | $0.37 \pm 0.02$ | $1.9 \pm 0.1$                             | 100        |

A  $V_{\max}$ =maximum rate;  $K_M$ =Michaelis-Menten constant (see ESI for experimental details and Table S2 for details on CaCO<sub>3</sub> yields.

**Table S3.** Microorganisms and responsible enzyme able to catalyse biocatalytic carboxylations. Reproduced with permission from ref. 1. Copyright 2010 Royal Society of Chemistry.

| Microorganism                                          | Responsible enzyme                                 | Substrates                            |
|--------------------------------------------------------|----------------------------------------------------|---------------------------------------|
| <i>Xanthobacter</i>                                    | Epoxide carboxylase                                | Epoxides                              |
| <i>Thauera aromatica</i>                               | Phenylphosphate carboxylase                        | Phenol, catechol, o-cresol            |
| <i>Enterobacter cloacae</i>                            | 4-Hydroxybenzoate decarboxylase                    | Phenol                                |
| <i>Chlamydomophila pneumoniae</i>                      | 4-Hydroxybenzoate decarboxylase                    | Phenol                                |
| <i>Clostridium hydroxybenzoicum</i>                    | 4-Hydroxy- and 3,4-dihydroxybenzoate decarboxylase | Phenol, catechol                      |
| <i>Sedimentibacter hydroxybenzoicus</i>                | 4-Hydroxy- and 3,4-dihydroxybenzoate decarboxylase | Phenol, catechol                      |
| <i>Agrobacterium tumefaciens</i>                       | 2,6-Dihydroxybenzoate decarboxylases               | $\gamma$ -Resorcinol                  |
| <i>Pandoraea</i> sp.                                   | 2,6-Dihydroxybenzoate decarboxylases               | Phenol, 1,2- and 1,3-dihydroxybenzene |
| <i>Rhizobium radiobacter</i> ,<br><i>Rhizobium</i> sp. | $\gamma$ -Resorcylic acid decarboxylase            | $\gamma$ -Resorcinol, catechol        |
| <i>Bacillus megaterium</i> ,<br><i>Serratia</i> sp.    | Pyrrole-2-carboxylate decarboxylase                | Pyrrole                               |
| <i>Brewer's yeast</i>                                  | Pyruvate decarboxylase                             | Acetaldehyde                          |

**Figure S9.** Proposed mechanism of carboxylation of pyrrole-2-carboxylate decarboxylase. ( $\text{R-CO}_2^-$  represents the organic acid required as ‘cofactor’.). Reproduced with permission from ref. 1. Copyright 2010 Royal Society of Chemistry.

A possible mechanism of action of pyrrole-2-carboxylate decarboxylase has been proposed, which suggests that the organic acid acting as “cofactor” to deprotonate the NH-moiety, thus causing a nucleophilic attack of C atom at the electrophile  $\text{CO}_2$ . After tautomerisation, the intermediate regains aromaticity. However, in view of the low acidity of the NH-moiety of pyrrole ( $\text{pK}_a$  16.5), this mechanism needs further exploitation.

**Figure S10.** An illustration of the BR/F<sub>0</sub>F<sub>1</sub>ATP synthase vesicle solar conversion system coupled to the Rubisco CBB cycle and trapped within the foam channels. Sunlight is converted into ATP which is then used by the CBB enzymes to generate sugar from CO<sub>2</sub> and NADH. Reproduced with permission from ref. 48. Copyright 2010 American Chemistry Society.

## Other references related to this *tutorial review*

### ***Conversion of CO<sub>2</sub> to formate by formate dehydrogenase or CO<sub>2</sub> reductase***

1. M. Yoshimoto, R. Yamasaki, M. Nakao, T. Yamashita, *Enzym. Microb. Technol.*, 2010, **46**, 588-593.
2. F. Kurayama, S. Suzuki, N. M. Bahadur, T. Furusawa, H. Ota, M. Sato, N. Suzuki, *J. Mater. Chem.*, 2012, **22**, 15405-15411.
3. R. Miyatani and Y. Amao, *Biotechnol. Lett.*, 2002, **24**, 1931-1934.

### ***Conversion of CO<sub>2</sub> to CO by CO dehydrogenase***

1. M. Can, F. A. Armstrong, S. W. Ragsdale, *Chem. Rev.*, 2014, **114**, 4149-4174.
2. A. Bachmeier, S. Hall, S. W. Ragsdale, F. A. Armstrong, *J. Am. Chem. Soc.*, 2014, **136**, 13518-13521.

### ***Conversion of CO<sub>2</sub> to methanol by multiple dehydrogenases***

- I. Ganesh., *Renew. Sustain. Energy Rev.*, 2014, 31, 221-257.
- J. F. Shi, L. Zhang and Z. Y. Jiang, *ACS Appl. Mater. Interfaces*, 2011, **3**, 881-889.
- J. F. Shi, X. L. Wang, Z. Y. Jiang, Y. P. Liang, Y. Y. Zhu and C. H. Zhang, *Bioresour. Technol.*, 2012, **118**, 359-366.

## Other references related to this *tutorial review*

### *Conversion of CO<sub>2</sub> to biodegradable chemicals by other decarboxylases*

1. C. A. G. M. Weijers, H. Jongejan, M. C. R. Franssen, A. de Groot and J. A. M. de Bont, *Appl. Microbiol. Biotechnol.*, 1995, **42**, 775-781
2. Z. He and J. Wiegel, *Eur. J. Biochem.*, 1995, **229**, 77-82.
3. Z. He and J. Wiegel, *J. Bacteriol.*, 1996, **178**, 3539-4353.
4. T. Matsui, T. Yoshida, T. Hayashi and T. Nagasawa, *Arch. Microbiol.*, 2006, **186**, 21-29.
5. J. Liu, X. Zhang, S. Zhou, P. Tao and J. Liu, *Curr. Microbiol.*, 2007, **54**, 102-107.
6. T. Yoshida, Y. Hayakawa, T. Matsui and T. Nagasawa, *Arch. Microbiol.*, 2004, **181**, 391-397.
7. Y. Ishii, Y. Narimatsu, Y. Iwasaki, N. Arai, K. Kino and K. Kirimura, *Biochem. Biophys. Res. Commun.*, 2004, **324**, 611-620.
8. M. Yoshida, N. Fukuhara and T. Oikawa, *J. Bacteriol.*, 2004, **186**, 6855-6863.
9. M. Wieser, T. Yoshida and T. Nagasawa, *J. Mol. Catal. B: Enzym.*, 2001, **11**, 179-184.
10. M. Wieser, N. Fujii, T. Yoshida and T. Nagasawa, *Eur. J. Biochem.*, 1998, **257**, 495-499.
11. M. Miyazaki, M. Shibue, K. Ogino, H. Nakamura and H. Maeda, *Chem. Commun.*, 2001, 1800-1801.
12. H. Omura, M. Wieser and T. Nagasawa, *Eur. J. Biochem.*, 1998, **253**, 480-484.

**Table S4-1.** Enzymes presented in the *tutorial review* and their classification numbers.

| Enzyme                                                       | Classification number | Enzyme                             | Classification number |
|--------------------------------------------------------------|-----------------------|------------------------------------|-----------------------|
| 1,5-bisphosphate ribulose bisphosphate carboxylase (Rubisco) | EC 4.1.1.39           | CO dehydrogenase (CODH)            | EC 1.2.2.4            |
| phosphoglyceraldehyde dehydrogenase                          | EC 1.2.1.12           | acetyl-CoA synthase                | EC 2.3.1.194          |
| phosphoribulokinase                                          | EC 2.7.1.19           | acetyl-CoA carboxylase             | EC 6.4.1.2            |
| $\alpha$ -ketoglutarate synthase/2-oxoglutarate synthase     | EC 1.2.7.3            | propionyl-CoA carboxylase          | EC 6.4.1.3            |
| isocitrate dehydrogenase                                     | EC 1.1.1.42           | malonate semialdehyde reductase    | EC 1.1.1.298          |
| ATP citrate lyase                                            | EC 2.3.3.8            | 3-hydroxypropionyl-CoA synthetase  | EC 6.2.1.36           |
| pyruvate synthase                                            | EC 1.2.7.1            | 3-hydroxypropionyl-CoA dehydratase | EC 4.2.1.116          |
| pyruvate kinase                                              | EC 2.7.1.40           | acryloyl-CoA reductase             | EC 1.3.1.95           |
| NADH-dependent formate dehydrogenase (FateDH)                | EC 1.2.1.2            | propionyl-CoA carboxylase          | EC 6.4.1.3            |
| methyltransferase                                            | EC 2.1.1.103          | 4-hydroxybutyryl-CoA dehydratase   | EC 4.2.1.120          |



**Table S4-2.** Enzymes presented in the *tutorial review* and their classification numbers.

| Enzyme                                                                     | Classification number | Enzyme                                       | Classification number |
|----------------------------------------------------------------------------|-----------------------|----------------------------------------------|-----------------------|
| carbonic anhydrase (CA)                                                    | EC 4.2.1.1            | pyruvate decarboxylase                       | EC 4.1.1.1            |
| CO <sub>2</sub> reductase                                                  | Unavailable           | methanol dehydrogenase (MDH)                 | EC 1.1.2.7            |
| remodeled nitrogenase                                                      | Unavailable           | formaldehyde dehydrogenase (FaldDH)          | EC 1.2.1.1            |
| formate dehydrogenase (FdhF1/2)                                            | EC 1.2.1.2            | alcohol dehydrogenase (ADH)                  | EC 1.1.1.1            |
| iron-iron hydrogenase (HydA2)                                              | EC 1.12.1.4           | glutamate dehydrogenase (GDH)                | EC 1.4.1.2            |
| [NiFe] CO dehydrogenases ([NiFe] CODH)                                     | EC 1.2.7.4            | phosphate dehydrogenase (PTDH)               | EC 1.1.1.17           |
| nitrogenase                                                                | EC 1.18.6.1           | acetolactate synthase (AlsS)                 | EC 2.2.1.6            |
| 4-hydroxybenzoate decarboxylases                                           | EC 4.1.1.63           | acetohydroxy acid isomeroreductase (IlvC)    | EC 1.1.1.86           |
| 3,4-dihydroxy-benzoate decarboxylase                                       | EC 4.1.1.43           | dihydroxy-acid dehydratase (IlvD)            | EC 4.2.1.9            |
| γ-resorcylic acid decarboxylases (or 2,6-dihydroxybenzoate decarboxylases) | Unavailable           | 2-ketoacid decarboxylase (Kdc)               | EC 1.2.4.1            |
| pyrrole-2-carboxylate decarboxylase                                        | EC 4.1.1.93           | L-Lactic acid by lactate dehydrogenase (LDH) | EC 1.1.1.27           |
